# Supplementary material for: Hospice care access inequalities: a systematic review and narrative synthesis
Source: HighWire-hosted journal article supplement (doi:10.1136/bmjspcare-2020-002719), 2021-02-19
Supplement: bmjspcare-2020-002719supp002_data_supplement.pdf [file bmjspcare-2020-002719supp002_data_supplement.pdf]

| First author + year with reference number | Title                                                                                                                                                                                             | Reference                                                     | Participants -                                                                                                                     | Death or referral | Key findings                                                                                                                                                                                                                                  | Gough weight of evidence |
|-------------------------------------------|---------------------------------------------------------------------------------------------------------------------------------------------------------------------------------------------------|---------------------------------------------------------------|------------------------------------------------------------------------------------------------------------------------------------|-------------------|-----------------------------------------------------------------------------------------------------------------------------------------------------------------------------------------------------------------------------------------------|--------------------------|
| 9. Addington-Hall 1998                    | Specialist palliative care in non-malignant disease.                                                                                                                                              | Palliative Medicine. 1998; 12: 417-427                        | 3696 patients randomly selected from death registrations in the last quarter of 1990 in 20 self-selected English health districts. | Death             | An estimated 71,744 further people dying from non-malignant disease in England and Wales each year may require specialist palliative care.                                                                                                    | MMM = <b>M</b>           |
| 10. Bennett 2016                          | What determines duration of palliative care before death for patients with advanced disease? A retrospective cohort study of community and hospital palliative care provision in a large UK city. | BMJ Open. 2016; 6: e012576                                    | 4650 referrals made to three SPC units (one HPC and two CPCs) in Leeds (UK) from April 2012 to March 2014.                         | Referral          | Referral to specialist palliative care services was more likely for those with cancer, those aged <85 years old and males.                                                                                                                    | MHL = <b>M</b>           |
| 11. Buck 2018                             | Persistent inequalities in Hospice at Home provision.                                                                                                                                             | BMJ Supportive & Palliative Care. 2018 10: e23                | 321 patients accepted for care by the Cambridgeshire (UK) Hospice at Home service.                                                 | Referral          | Those with cancer, high socio-economic status, males, aged 78 or older were more likely to access hospice at home. Those with non-malignant disease and who lived in less affluent or rural areas were less likely to access hospice at home. | MHH = <b>H</b>           |
| 12. Cox 2017                              | A review of specialist palliative care provision and access across London – mapping the capital.                                                                                                  | London Journal of Primary Care. 2017; 9(3): 33-37.            | Service mapping of SPC services in London (UK) in 2013 and 2014.                                                                   | Death             | There was variability in the proportion of patients with non-malignant diagnoses seen by SPC services.                                                                                                                                        | MML = <b>M</b>           |
| 13. Currow 2008b                          | Populations who die without specialist palliative care: does lower uptake equate with unmet need?                                                                                                 | Palliative Medicine. 2008; 22: 43-50.                         | Survey of 18,224 bereaved South Australian residents between 2000 and 2005.                                                        | Death             | SPC referral was associated with cancer diagnosis and higher income.                                                                                                                                                                          | MLL = <b>L</b>           |
| 14. Currow 2008a                          | Place of Death for People with Non-cancer and Cancer illness in South Australia: a Population-Based Survey.                                                                                       | Journal of Palliative Care. 2008; 24(3): 144-150.             | Population survey of 9500 households in South Australia.                                                                           | Referral          | Those with non-malignant disease were less likely to die in hospice than cancer patients.                                                                                                                                                     | MLL = <b>L</b>           |
| 15. Gao 2011                              | Identifying Population Groups with Low Palliative Care Program Enrolment Using Classification and Regression Tree Analysis.                                                                       | Journal of Palliative Care. 2011; 27(2): 98-106.              | 6892 adults who died of cancer in Nova Scotia (Canada) between 2000 and 2005.                                                      | Death             | Increasing age, male gender and rural location were associated with reduced access to palliative care services.                                                                                                                               | HHM = <b>M</b>           |
| 16. Gao 2013                              | Changing patterns in place of cancer death in England: a population-based study.                                                                                                                  | PLoS Med. 2013; 10(3): e1001410.                              | All cancer deaths (n=2,281,223) in England collected by ONS between 1993 and 2010.                                                 | Referral          | Elderly patients or those with haematological malignancies were more likely to access hospice services in 2006-2010 compared to 1993-1995.                                                                                                    | HHM = <b>H</b>           |
| 17. Gao 2014                              | Geographical and temporal Understanding In place of Death in England (1984–2010): analysis of trends and associated factors to improve end-of-life Care (GUIDE_Care).                             | Health Services and Delivery Research. 2014                   | All registered deaths (n = 13,154,705) that occurred between 1984 and 2010 in England.                                             | Referral          | 17% of cancer deaths and 4% of deaths from neurological causes occurred in a hospice.                                                                                                                                                         | MLM = <b>M</b>           |
| 18. Gilbert 2010                          | Increased non-cancer admissions to hospice palliative care units – will this hurt cancer care?                                                                                                    | Palliative Medicine. 2010; 1: S176.                           | 3723 patients admitted to four hospice palliative care units in Canada between 2002 and 2009.                                      | Death             | There was an increase in non-cancer patient admissions to hospice units.                                                                                                                                                                      | LMM = <b>M</b>           |
| 19. Gomes 2012                            | Reversal of the British trends in place of death: Time series analysis 2004-2010.                                                                                                                 | Palliative Medicine. 2012; 26(2): 102-107.                    | All decedents (n = 3,525,564) in England and Wales (UK) between 2004 and 2010.                                                     | Referral          | There was an increase in the proportion of deaths taking place in inpatient hospices for both cancer and non-cancer patients.                                                                                                                 | HHM = <b>H</b>           |
| 20. Gomes 2008                            | Where people die (1974-2030): past trends, future projection and implications for care.                                                                                                           | Palliative Medicine. 2008; 22: 33–41.                         | Aggregated ONS data on all deaths in England and Wales between 1974 and 2003.                                                      | Referral          | There has been only a small change (0.1%) in the numbers of people dying in a hospice.                                                                                                                                                        | MLL = <b>L</b>           |
| 21. Grande 2006                           | The influence of patient and carer age in access to palliative care services.                                                                                                                     | Age and Ageing. 2006; 35: 267-273.                            | 123 patients referred to a UK hospice at home service whose primary carer could be interviewed.                                    | Death             | Patients who received inpatient hospice care tended to be younger, female, and have cancer.                                                                                                                                                   | HHH = <b>H</b>           |
| 22. Harrison 2012                         | Are UK primary care teams formally identifying patients for palliative care before they die?                                                                                                      | British Journal of General Practice. 2012; 62(598): e344-e342 | 201 patients from 6 GP surgeries in Scotland listed as palliative on records.                                                      | Death             | Hospice death was more likely amongst cancer patients compared to patients with dementia and organ failure.                                                                                                                                   | MMM = <b>M</b>           |

|                     |                                                                                                                                                                     |                                                                   |                                                                                                                                       |                    |                                                                                                                                                                                                                                                                                                                                                                                 |                |
|---------------------|---------------------------------------------------------------------------------------------------------------------------------------------------------------------|-------------------------------------------------------------------|---------------------------------------------------------------------------------------------------------------------------------------|--------------------|---------------------------------------------------------------------------------------------------------------------------------------------------------------------------------------------------------------------------------------------------------------------------------------------------------------------------------------------------------------------------------|----------------|
| 23. Hunt 1996       | A population-based study of the coverage of cancer patients by hospice services.                                                                                    | Palliative Medicine. 1996; 10: 5-12.                              | 2800 cancer decedents in South Australia in 1990.                                                                                     | Referral           | Patients that missed out on hospice services included the elderly, those with a haematological malignancy, and rural residents.                                                                                                                                                                                                                                                 | HHH = <b>H</b> |
| 24. McCarthy 1990   | Hospice patients: a pilot study in 12 services.                                                                                                                     | Palliative Medicine. 1990; 4: 93-104                              | 195 patients seen by 12 hospices across the UK in July 1998.                                                                          | Death              | The majority of patients referred to a hospice were married or widowed and were of UK or Irish descent.                                                                                                                                                                                                                                                                         | MMH = <b>M</b> |
| 25. McNamara 2007a  | Factors affecting place of death in Western Australia.                                                                                                              | Health and Place. 2007; 13: 356-367.                              | 26,882 decedents in Western Australia between July 2000 and December 2002.                                                            | Referral           | 1.4% of those with a non-cancer condition died in a hospice compared to 17.1% of those with cancer.                                                                                                                                                                                                                                                                             | HMH = <b>H</b> |
| 26. Napolskikh 2009 | Demographic profile and utilization statistics of a Canadian inpatient palliative care unit within a tertiary care setting.                                         | Current Oncology. 2009; 16(1): 49-54.                             | 508 referrals made to the Palliative Care Unit at the Sunnybrook Health Sciences Centre, Canada between 2005-6.                       | Death              | Most patients referred to the inpatient palliative care unit were male and had a malignant diagnosis. Hematologic patients had less access.                                                                                                                                                                                                                                     | LMM = <b>M</b> |
| 27. Pivodic 2016    | Place of death in the population dying from diseases indicative of palliative care need: a cross-national population-level study in 14 countries.                   | Journal of Epidemiology and Community Health. 2016; 70(1): 17-24. | Decedents (n= 2,220,997) with diseases indicative of palliative care need in 14 countries in 2008.                                    | Referral           | Death in a palliative care institution were less likely for non-cancer patients, those over 80, those not married and male patients.                                                                                                                                                                                                                                            | HHH = <b>H</b> |
| 28. Rosenwax 2016   | A retrospective population based cohort study of access to specialist palliative care in the last year of life: who is still missing out a decade on?               | BMC Palliative Care. 2016; 15: 46.                                | 12,816 decedents in Western Australia 2009-10 who had an underlying cause of death potentially amenable to receiving palliative care. | Death              | SPC services were accessed by 14% decedents with non-cancer conditions, representing a 6% increase on SPC access reported for the same decedent group ten years earlier.                                                                                                                                                                                                        | HHH = <b>H</b> |
| 29. Rosenwax 2006   | Who receives specialist palliative care in Western Australia – and who misses out.                                                                                  | Palliative Medicine. 2006; 20: 439-445.                           | 26,882 decedents in Western Australia 2000-2 who died from cancer or selected non-cancer conditions.                                  | Referral and death | Comorbid conditions, age >75, not being married, living in a rural location impacted negatively on SPC usage.                                                                                                                                                                                                                                                                   | HMM = <b>M</b> |
| 30. Sharpe 2016     | "Don't leave me this way": Recognising the unrecognised need for specialist palliative care in the general hospital population.                                     | Palliative Medicine. 2016; 30(4): S95                             | 223 patients admitted to the Royal Sussex County Hospital (UK) between June and November 2014.                                        | Referral           | Those not identified as having specialist palliative care needs by health care professionals were more likely to have a non-cancer diagnosis, be over the age of 85 and have higher rates of cognitive impairment.                                                                                                                                                              | MLL = <b>L</b> |
| 31. Sleeman 2016    | The changing demographics of inpatient hospice death: Population-based cross-sectional study in England, 1993–2012.                                                 | Palliative Medicine 2016; 30(1): 45-53                            | 446,615 patients dying in inpatient hospice units in England, from 1993-2012.                                                         | Death              | Very few non-cancer patients died in hospice, despite this improving over time, including for haematological malignancies. The average age of hospice patients also increased, with more 85+ decedents. Most hospice patients were men and were married. There was a decrease in hospice deaths amongst the most deprived quintile, but an increase amongst the least deprived. | HHH = <b>H</b> |
| 32. Sleeman 2014    | Reversal of English trend towards hospital death in dementia: a population-based study of place of death and associated individual and regional factors, 2001–2010. | BMC Neurology. 2014; 14: 59.                                      | 388,899 patients dying with dementia in England between 2001 and 2010.                                                                | Death              | Few dementia patients died at hospice (0.3%). Those who were female, younger, married, lived in urban areas and had an underlying cause of death of cancer died in hospice more often. Those belonging to the most deprived quintile died in hospice the least compared to other quintiles.                                                                                     | HHH = <b>H</b> |
| 33. Taylor 2011     | Place of death related to demographic factors for hospice patients in Wellington, Aotearoa New Zealand.                                                             | Palliative Medicine. 2011; 26(4): 342-349.                        | 1268 patients receiving services from the Mary Potter hospice in New Zealand from 2006-8.                                             | Death              | Asian ethnicity, cancer diagnosis, being married, younger age and being admitted initially to hospice for respite care were associated with an increased likelihood of hospice death. Other ethnic minorities had less access.                                                                                                                                                  | HMH = <b>H</b> |
| 34. Allsop 2018     | Duration and determinants of hospice-based specialist palliative care: A national retrospective cohort study.                                                       | Palliative Medicine. 2018; 32(8): 1322-33.                        | 42,758 adult decedents with progressive, advanced disease, with a prior referral from 64 UK hospices.                                 | Referral           | Those with cancer, MND, heart failure, being female, being of black/ African/ Caribbean/ Black British ethnicity, or living in the south of England, had longer referral to death days. Those with a non-cancer diagnosis, increasing age, being male, dementia, stroke, lung/ liver cancer, liver/ kidney failure had shorter referral to death days.                          | HMH = <b>H</b> |
| 35. Currow 2004     | Specialist palliative care needs of whole populations: a feasibility study using a novel approach.                                                                  | Palliative Medicine. 2004; 18(3): 239-47.                         | 3027 randomly selected South Australians.                                                                                             | Referral           | People with a cancer diagnosis were more likely to access specialised palliative care services. Those with an income above AU\$60,000 per year were more likely to report the use of palliative care services.                                                                                                                                                                  | HMH = <b>H</b> |

|                         |                                                                                                                                                                            |                                                                          |                                                                                                                                                                         |                    |                                                                                                                                                                                                                                                                                     |         |
|-------------------------|----------------------------------------------------------------------------------------------------------------------------------------------------------------------------|--------------------------------------------------------------------------|-------------------------------------------------------------------------------------------------------------------------------------------------------------------------|--------------------|-------------------------------------------------------------------------------------------------------------------------------------------------------------------------------------------------------------------------------------------------------------------------------------|---------|
|                         |                                                                                                                                                                            |                                                                          |                                                                                                                                                                         |                    | Rates of access to specialist palliative care services were similar regardless of country of birth, educational level, or residential region.                                                                                                                                       |         |
| 36. Kelly 2018          | The dementia patient's pathway through the Specialist Palliative Care services Part I.                                                                                     | European Journal of Palliative Care. 2018; 25(1): 37-39.                 | 409 Referrals to an SPC service during 2012.                                                                                                                            | Referral           | 42% of referrals had a non-malignant diagnosis and 58% had a malignant diagnosis; 15% met the inclusion criteria of having been referred with a primary diagnosis of dementia (7%) or having a co-morbidity of a diagnosis of dementia (8%); 44% were aged 80–89 years.             | LML = L |
| 37. Verne 2013          | Increasing numbers of colorectal cancer patients are dying at home or in care homes in England over the past decade                                                        | Colorectal Disease. 2013; 15: 102.                                       | Mortality records for England (UK collected by ONS between 2002 and 2011 (N = not known).                                                                               | Death              | The total number of deaths from colorectal cancer in hospices remained stable between 2002 and 2011. Deaths in hospice for colon and rectal cancers were younger than 65.                                                                                                           | LLL = L |
| 38. Addington-Hall 2000 | Which terminally ill cancer patients in the United Kingdom receive care from community specialist palliative care nurses?                                                  | Journal of Advanced Nursing. 2000; 32(4): 799-806                        | 2074 cancer decedents in last quarter of 1990 in 20 self-selected English districts.                                                                                    | Death              | Patients who had haematological malignancies, who were aged over 75 or who were not married were less likely to receive specialist palliative nursing care.                                                                                                                         | HML = M |
| 39. Ansell 2007         | What determines referral of UK patients with haematological malignancies to palliative care services? An exploratory study using hospital records.                         | Palliative Medicine. 2007; 21: 487-492.                                  | 122 adults registered with the Haematological Malignancy Research Network (UK) and diagnosed with a haematological malignancy between September 2004 and November 2005. | Death and referral | 33 patients were referred to SPC services. Eight died in a hospice.                                                                                                                                                                                                                 | MHM = M |
| 40. Auret 2003          | Australasian haematologist referral patterns to palliative care: lack of consensus on when and why.                                                                        | Internal Medicine Journal. 2003; 33: 566-571.                            | Questionnaire of 51 delegates attending the Haematology Society of Australia and New Zealand Congress 2000.                                                             | Referral           | 29% of respondents had difficulties referring to SPC services.                                                                                                                                                                                                                      | LLH = M |
| 41. Gatrell 2003        | Place of death: analysis of cancer deaths in part of North West England.                                                                                                   | Journal of Public Health Medicine. 2003; 25(1): 53-55.                   | 6900 deaths within the 89 electoral wards of the Morecambe Bay area (UK) between 1993 and 2000.                                                                         | Death              | Patients with cancer of the lymphatic system were less likely to die in hospice. Patients in wards close to the hospice were more likely to die in a hospice.                                                                                                                       | HMM = M |
| 42. Howell 2013         | Place of death in haematological malignancy: variations by disease subtype and time from diagnosis to death.                                                               | BMC Palliative Care. 2013; 12: 42.                                       | 4839 patients dying of haematological malignancies in the UK who had been diagnosed between 2004 and 2010.                                                              | Referral           | 7.5% of patients died in a hospice and this percentage differed amongst different haematological malignancies.                                                                                                                                                                      | HMM = H |
| 43. Howell 2015         | Variations in specialist palliative care referrals: findings from a population-based patient cohort of acute myeloid leukaemia, diffuse large B-cell lymphoma and myeloma. | BMJ Supportive and Palliative Care. 2015; 5: 496-502.                    | 323 patients dying of haematological malignancies in the UK who had been diagnosed between 2005 and 2008.                                                               | Death              | There was a difference in referral rates to SPC services between different haematological malignancies.                                                                                                                                                                             | HMM = H |
| 44. Hunt 1993           | Trends in the terminal care of cancer patients: South Australia, 1981-1990.                                                                                                | Australian and New Zealand Journal of Medicine. 1993; 2: 245-251.        | 2715 cancer decedents in South Australia in 1990.                                                                                                                       | Referral           | The location of care for terminal cancer patients shifted from hospital to hospice services from 1981-1990.                                                                                                                                                                         | HHH = H |
| 45. Hunt 1998           | Coverage of cancer patients by hospice services, South Australia, 1990 to 1993.                                                                                            | Australian and New Zealand Journal of Public Health. 1998; 22(1): 45-48. | 2800 and 2873 patients using hospice services in South Australia in 1990 and 1993 respectively.                                                                         | Death              | Similarly reports that rural residents, the elderly, and those with a haematological malignancy often miss out on hospice services.                                                                                                                                                 | HHH = H |
| 46. Hunt 2001           | Where patients with cancer die in South Australia, 1990-1999: a population-based review.                                                                                   | The Medical Journal of Australia. 2001; 175(10): 426-9.                  | 29230 cancer decedents in South Australia between 1990 and 1999.                                                                                                        | Death              | Patients who were most likely to die in a hospice included females, those aged 70-79, and those from higher socioeconomic groups. Patients who were least likely to die in a hospice included those with haematological malignancies, and those with Aboriginal or Asian ethnicity. | HHH = H |
| 47. Hunt 2019           | Where patients with cancer die: a population-based study, 1990 to 2012.                                                                                                    | Journal of Palliative Care. 2019; 34(4): 224-31.                         | Registry records of 86, 257 patients with cancer who died from 1990 to 2012.                                                                                            | Referral           | Cancer patients were more likely to die in hospice if they were young and had a high socioeconomic status. Older patients and those with lower socioeconomic status were less likely to die in hospice. Those                                                                       | HMM = M |

|                   |                                                                                                                                                 |                                                              |                                                                                                                                                                                           |          |                                                                                                                                                                                                                                                                                                          |                |
|-------------------|-------------------------------------------------------------------------------------------------------------------------------------------------|--------------------------------------------------------------|-------------------------------------------------------------------------------------------------------------------------------------------------------------------------------------------|----------|----------------------------------------------------------------------------------------------------------------------------------------------------------------------------------------------------------------------------------------------------------------------------------------------------------|----------------|
|                   |                                                                                                                                                 |                                                              |                                                                                                                                                                                           |          | with primary cancers of breast, prostate, head and neck and melanoma had lower odds of dying in hospice. Asian and Aboriginal and Torres Strait Islander people were less likely than Caucasians to receive in-hospice care.                                                                             |                |
| 48. Johnston 1998 | Identifying potential need for cancer palliation in Nova Scotia.                                                                                | Canadian Medical Association Journal. 1998; 158(13): 1691-8. | All adults (n = 14,494) who had died of cancer from 1988 to 1994 in Nova Scotia.                                                                                                          | Death    | Elderly patients, as well as those with a haematological malignancy, were less likely to be referred to palliative care services.                                                                                                                                                                        | HHH = <b>H</b> |
| 49. Vidrine 2016  | Place of death in patients with haematological malignancy in North-East of England: Where does this happen and what factors may influence this? | British Journal of Haematology. 2016; 173 S1: 33             | Case note audit of 39 haematological cancer decedents under the care of a cancer centre in Newcastle-upon-Tyne (UK) between March and August 2015.                                        | Death    | Only two patients (6.5%) with a haematological malignancy died in a hospice.                                                                                                                                                                                                                             | LLL = <b>L</b> |
| 50. Campbell 2014 | Discrepancy between preferred and actual place of death in patients with acute heart failure.                                                   | European Journal of Heart Failure. 2014; 16: 122.            | 114 patients with acute heart failure recruited between January 2013 and August 2013 in Glasgow (UK).                                                                                     | Death    | 5% of patients with heart failure died in a hospice.                                                                                                                                                                                                                                                     | MLL = <b>L</b> |
| 51. Cheang 2015   | Current challenges in palliative care provision for heart failure in the UK: a survey on the perspectives of palliative care professionals.     | Open Heart. 2015; 2(1): e000188.                             | Survey of 499 medical professionals working in palliative care in the UK between June and December 2013.                                                                                  |          | The average heart failure burden was 3% of the total palliative care workload.                                                                                                                                                                                                                           | HHM = <b>H</b> |
| 52. French 2011   | Where do elderly patients with heart failure die?                                                                                               | Age and Ageing. 2011; 40: S23.                               | 494 heart failure decedents who had been referred to a heart failure service at Sunderland Royal Hospital (UK) between 2001 and 2007.                                                     | Death    | 0.9% of the cohort died in a hospice.                                                                                                                                                                                                                                                                    | LLM = <b>L</b> |
| 53. Gibbs 2006    | Survey of specialist palliative care and heart failure: September 2004.                                                                         | Palliative Medicine. 2006; 20: 603-609.                      | Survey of 233 consultants of English SPC services.                                                                                                                                        | Death    | Each service had a mean number of 0.8 patients with heart failure.                                                                                                                                                                                                                                       | LLL = <b>L</b> |
| 54. Horne 2004    | Removing the boundaries: palliative care for patients with heart failure.                                                                       | Palliative Medicine. 2004; 18: 291-296.                      | Interview of 20 patients in Doncaster (UK) who had a clinical diagnosis of heart failure between October 2001 and March 2002.                                                             | Death    | None of the patients had been referred to SPC services.                                                                                                                                                                                                                                                  | MLL = <b>L</b> |
| 55. Chen 2017     | General Practitioner Perceptions of Current Services for Heart Failure Patients: A Qualitative Study.                                           | European Journal of Heart Failure. 2017; 19: S1.             | Interviews with 20 GPs in Northern Ireland (UK), conducted between June and August 2016.                                                                                                  | Referral | GPs reported poor awareness of the role of SPC services in heart failure.                                                                                                                                                                                                                                | LLL = <b>L</b> |
| 56. Jones 1995    | Palliative care in terminal cardiac failure.                                                                                                    | British Medical Journal. 1995; 310: 805                      | Survey of 10 hospices in North-East London and Essex (UK).                                                                                                                                | Referral | Four of the surveyed hospices would consider admitting patients with a primary diagnosis of end stage cardiac failure, only two of these had admitted patients with this condition in the past year. However, this was matched by few requests for palliative care beds for patients with heart failure. | LMM = <b>M</b> |
| 57. Kaul 2016     | Home, hospital or hospice? Trends and predictors of location of death among patients with heart failure and acute coronary syndromes.           | European Heart Journal. 2016; 37 S1: 532.                    | All patients discharged alive from hospitalisation with a primary diagnosis of HF (n=31,274) or ACS (n=54,886) in Alberta Canada between April 2002 and March 2014.                       | Death    | Less than 2% of patients with HF or ACS died in a hospice, and these rates have not changed over time.                                                                                                                                                                                                   | LLM = <b>L</b> |
| 58. McKinley 2004 | Care of people dying with malignant and cardiorespiratory disease in general practice.                                                          | British Journal of General Practice. 2004; 54(509): 909-913. | 154 decedents with malignant or cardiorespiratory disease from two Leicestershire (UK) general practices between August 2000 and July 2002.                                               | Death    | 18% of the cancer decedents died in a hospice compared to 0% of those with cardiorespiratory disease.                                                                                                                                                                                                    | HML = <b>M</b> |
| 59. Murray 2002   | Dying of lung cancer or cardiac failure: prospective qualitative interview study of patients and their carers in the community.                 | British Medical Journal. 2002; 325(7370): 929.               | Interview and focus groups of 20 outpatients with inoperable lung cancer and 20 patients with advanced cardiac failure and their main informal and professional carers in Edinburgh (UK). | Referral | Specialist palliative care and hospice referral was more likely for lung cancer patients than heart failure patients.                                                                                                                                                                                    | MMH = <b>M</b> |

|                    |                                                                                                                                                                            |                                                           |                                                                                                                                                                               |          |                                                                                                                                                                                                                            |                |
|--------------------|----------------------------------------------------------------------------------------------------------------------------------------------------------------------------|-----------------------------------------------------------|-------------------------------------------------------------------------------------------------------------------------------------------------------------------------------|----------|----------------------------------------------------------------------------------------------------------------------------------------------------------------------------------------------------------------------------|----------------|
| 60. Thorns 2001    | Management of severe heart failure by specialist palliative care.                                                                                                          | Heart. 2001; 85: 93                                       | 9920 patients referred to St Christopher's Hospice, London (UK) between 1994 and 1999 for heart failure.                                                                      | Referral | 19 patients were referred to the hospice with heart failure.                                                                                                                                                               | HHH = <b>H</b> |
| 61. Woolcock 2014  | The role of Specialist Palliative Care Services in the Management of patients with pulmonary arterial hypertension; a review of current practice.                          | Thorax. 2014; 69: A144                                    | 31 UK patients with pulmonary arterial hypertension who died between June 2013 and June 2014.                                                                                 | Death    | Only four patients received palliative care input in the community. Only 11 (35%) had documented evidence of specialist palliative care involvement.                                                                       | LLL = <b>L</b> |
| 62. Addy 2014      | Improving care for adults with end stage cystic fibrosis at Bristol Adult CF Centre (BACFC).                                                                               | Journal of Cystic Fibrosis. 2014; 13: S10                 | 17 CF decedents at the Bristol (UK) Adult Cystic Fibrosis Centre between 2007 and 2013.                                                                                       | Death    | Only one patient with CF died in a hospice.                                                                                                                                                                                | LLL = <b>L</b> |
| 63. Cohen 2017     | Differences in place of death between lung cancer and COPD patients: a 14-country study using death certificate data.                                                      | Primary Care Respiratory Medicine. 2017; 27(1): 14.       | 561,151 decedents across 14 countries in 2008.                                                                                                                                | Referral | In England, Wales and New Zealand, COPD decedents had a significantly lower chance of dying in a palliative care institution than lung cancer decedents.                                                                   | HLM = <b>M</b> |
| 64. Edmonds 2001   | A comparison of the palliative care needs of patients dying from chronic respiratory diseases and lung cancer.                                                             | Palliative Medicine. 2001; 16: 287-295.                   | Interview of the bereaved relatives of 449 lung cancer and 87 chronic lung disease decedents in England.                                                                      | Death    | Patients with lung cancer were more likely to receive hospice care than those with chronic lung disease                                                                                                                    | HMH = <b>H</b> |
| 65. Elkington 2005 | The healthcare needs of chronic obstructive pulmonary disease patients in the last year of life.                                                                           | Palliative Medicine. 2005; 19: 485-491.                   | Questionnaire of bereaved informants of 209 chronic obstructive pulmonary disease decedents in London (UK).                                                                   | Referral | Only one chronic obstructive pulmonary disease patient died in a hospice.                                                                                                                                                  | MLL = <b>L</b> |
| 66. Gore 2000      | How well do we care for patients with end stage chronic obstructive pulmonary disease (COPD)? A comparison of palliative care and quality of life in COPD and lung cancer. | Thorax. 2000; 55: 1000-1006.                              | Questionnaire of R+C patients with COPD and 50 patients with NSCLC in Hull (UK).                                                                                              | Death    | 30% of patients with non-small cell lung cancer received help from a Marie Curie nurse, Macmillan nurse or hospice centre. In contrast, none of the patients with COPD received, or were offered access to these services. | HHH = <b>H</b> |
| 67. Hayle 2010     | Palliative care for patients with COPD: the impact of collaborative working in Salford.                                                                                    | Palliative Medicine. 2010; 24: 202-252.                   | Two retrospective case-note reviews of patients with COPD referred to specialist palliative care services in Salford (UK) in 2006-7 and 2007-8.                               | Referral | Referrals to palliative care for COPD patients increased from 12% to 38% within the period studied.                                                                                                                        | MLM = <b>M</b> |
| 68. Higginson 2017 | Which patients with advanced respiratory disease die in hospital? A 14-year population-based study of trends and associated factors.                                       | BMC Medicine. 2017; 15: 19.                               | All deaths (n = 380,232) in England between 2001 and 2014 inclusive with COPD or IPD as a cause of death.                                                                     | Death    | Deaths within hospices accounted for just 0.9% of chronic obstructive pulmonary disease and 2.9% of interstitial pulmonary diseases cases.                                                                                 | HMM = <b>M</b> |
| 69. McVeigh 2016   | The provision of generalist and specialist palliative care for patients with non-malignant respiratory disease in the North and Republic of Ireland: a qualitative study.  | BMC Palliative Care. 2016; 17: 6.                         | Interview and focus groups involving 17 bereaved carers and 18 healthcare providers for non-malignant respiratory disease patients in the North and Republic of Ireland (UK). | Death    | Specialist palliative care was offered to a minority of these patients and only at the end of life.                                                                                                                        | MLL = <b>L</b> |
| 70. Partridge 2009 | Palliative Care Services for those with chronic lung disease.                                                                                                              | Chronic Respiratory Disease. 2009; 6: 13-17.              | Survey of 107 respiratory physicians working in 104 major hospitals in the UK.                                                                                                | Death    | 81% of respondents felt that there were gaps in current SPC services in their locality for patients with severe chronic non-malignant lung disease.                                                                        | MMH = <b>M</b> |
| 71. Smallwood 2016 | Palliation of patients with chronic obstructive pulmonary disease at the end of life.                                                                                      | Respirology. 2006; 21 S2: p143.                           | Medical record audit of 113 patients who died from COPD at The Royal Melbourne Hospital, Australia between 2004 and 2013.                                                     | Death    | Only 11 (16.7%) patients with COPD received specialist palliative care prior to terminal admission.                                                                                                                        | LLL = <b>L</b> |
| 72. Gunda 2005     | National Survey of Palliative Care in End Stage Renal Disease in the UK.                                                                                                   | Nephrology Dialysis Transplantation. 2005; 20: 392-395.   | Questionnaire of representatives from 69 UK Renal units.                                                                                                                      | Referral | Local hospices were 'usually' or 'always' involved with 20% of Renal Units.                                                                                                                                                | MLL = <b>L</b> |
| 73. Hobson 2011    | National Survey of the Current Provision of Specialist Palliative Care Services for Patients with End Stage Renal Disease.                                                 | Nephrology Dialysis Transplantation. 2011; 26: 1275-1281. | Questionnaire of 318 lead clinicians in UK adult hospital, hospice and                                                                                                        | Referral | Most specialist palliative care respondents believed that SPC has a role in providing care for end-stage renal disease patients.                                                                                           | MMH = <b>M</b> |

|                     |                                                                                                                                                                                                  |                                                                                  |                                                                                                                                                                                             |          |                                                                                                                                                                                                                                |         |
|---------------------|--------------------------------------------------------------------------------------------------------------------------------------------------------------------------------------------------|----------------------------------------------------------------------------------|---------------------------------------------------------------------------------------------------------------------------------------------------------------------------------------------|----------|--------------------------------------------------------------------------------------------------------------------------------------------------------------------------------------------------------------------------------|---------|
|                     |                                                                                                                                                                                                  |                                                                                  | community SPC services. The survey was conducted in 2008.                                                                                                                                   |          |                                                                                                                                                                                                                                |         |
| 74. Hussain 2013    | Comparison of survival analysis and palliative care involvement in patients aged over 70 years choosing conservative management or renal replacement therapy in advanced chronic kidney disease. | Palliative Medicine. 2013; 27(9): 829-839                                        | 441 patients located within West Yorkshire (UK) who were referred for pre-dialysis care.                                                                                                    | Death    | Patients in the conservative management group had greater access to specialist palliative care services compared to those who underwent renal replacement therapy.                                                             | MHH = H |
| 75. Lovell 2017     | Understanding patterns and factors associated with place of death in patients with end-stage kidney disease: A retrospective cohort study.                                                       | Palliative Medicine. 2017; 31(3): 283-288.                                       | Patients (n =321) with chronic kidney disease stage 4-5 aged 75 and above known to one UK renal team between 2006-2012.                                                                     | Death    | Place of death varied according to management pathway: patients who had conservative management were much less likely to die in a hospice than those receiving renal replacement therapy.                                      | HMM = M |
| 76. Okamoto 2015    | Conservative Care for ESRD in the United Kingdom: A National Survey.                                                                                                                             | Clinical Journal of the American Society of Nephrology. 2015; 10(1): 120-126.    | Survey of health care professionals from 67 of the UK's Renal units, in March 2013.                                                                                                         | Death    | All units worked with specialist palliative care services to care for chronic kidney disease patients.                                                                                                                         | MHH = H |
| 77. Morton 2016     | Conservative Management and End-of-Life Care in an Australian Cohort with ESRD.                                                                                                                  | Clinical Journal of the American Society of Nephrology. 2016; 11(12): 2195-2203. | 721 patients commencing renal replacement therapy in 66 Australian Renal Units in 2009.                                                                                                     | Death    | Patients on renal replacement therapy were less likely to die in a hospice than patients managed conservatively.                                                                                                               | HMM = H |
| 78. Bablitz 2016    | High CAGE score and late referral pattern typify end-stage liver failure patients referred to a regional palliative care program.                                                                | Journal of Pain and Symptom Management. 2016; 52(6): e111.                       | 265 decedents with cirrhosis evaluated for liver transplantation at the University of Alberta Hospital (Canada) between January 2000 and December 2013.                                     | Referral | 22% patients were referred to regional SPC services.                                                                                                                                                                           | LML = L |
| 79. Low 2016        | Palliative Care for Cirrhosis: a UK survey of health professionals' perceptions, current practice and future needs.                                                                              | Frontline Gastroenterology. 2016; 7: 4-9.                                        | Questionnaire of 517 UK health care professionals working in hepatology teams, specialist palliative care and general practitioners with an interest in gastroenterology.                   | Death    | Patients with cirrhosis made up 1% of the specialist palliative care workload. Referrals made by hepatology professionals to specialist palliative care were low.                                                              | MMM = M |
| 80. Low 2017        | Advanced chronic liver disease in the last year of life: a mixed methods study to understand how care in a specialist liver unit could be improved.                                              | BMJ Open. 2017; 7(8): e016887.                                                   | Interview and focus group of 30 patients with liver cirrhosis who attended a tertiary referral liver transplant centre in North London (UK) and died between April 2010 and September 2011. | Death    | Only 7% of the patients died in a hospice.                                                                                                                                                                                     | HLL = L |
| 81. Poonja 2014     | Patients with cirrhosis and denied liver transplants rarely receive adequate palliative care or appropriate management.                                                                          | Clinical Gastroenterology and Hepatology. 2014; 12: 692-698.                     | 102 patients with cirrhosis in Edmonton, Canada who were delisted or declined liver transplant from January 2005 to December 2010.                                                          | Referral | Only 11 patients were referred for palliative care, and four died in a hospice, despite a large need for palliative care services.                                                                                             | MMM = M |
| 82. Crowther 2013   | Palliative care for dementia – time to think again?                                                                                                                                              | QJM: An international Journal of Medicine. 2013; 106(6): 491-494.                | Interview of 40 bereaved people who had cared for a patient with dementia in the UK between 2008 and 2011.                                                                                  | Death    | There were only four referrals to SPC and end of life services.                                                                                                                                                                | MLM = M |
| 83. Houttekier 2010 | Place of death of older persons with dementia. A study in five European countries.                                                                                                               | Journal of American Geriatric Society. 2010; 58(4): 751.                         | 30,281 dementia patients across five European countries (England, Wales, Scotland, Belgium the Netherlands) in 2003.                                                                        | Referral | Patients with dementia were referred to SPC less frequently, and often late in the course of the disease, explaining why so few died in a hospice.                                                                             | HML = M |
| 84. Zheng 2013      | How good is primary care at identifying patients who need palliative care? A mixed methods study.                                                                                                | European Journal of Palliative Care. 2013; 20(5): 216-222.                       | Case note review of nine Scottish (UK) GP practices over a 12 month period, comprising the notes of 684 patients.                                                                           | Referral | Palliative care was often initiated too late, and perceived as being appropriate only for patients who appeared to be reaching a terminal decline. Dementia patients had difficulties in accessing specialist palliative care. | HHH = H |



|                         |                                                                                                                                                          |                                                                       |                                                                                                                                                                                            |          |                                                                                                                                                                                                                                                                           |                |
|-------------------------|----------------------------------------------------------------------------------------------------------------------------------------------------------|-----------------------------------------------------------------------|--------------------------------------------------------------------------------------------------------------------------------------------------------------------------------------------|----------|---------------------------------------------------------------------------------------------------------------------------------------------------------------------------------------------------------------------------------------------------------------------------|----------------|
| 85. Chaudri 2003        | Patterns of mortality in patients with motor neurone disease.                                                                                            | Acta Neurologica Scandinavica. 2003; 107: 50-53.                      | 179 decedents with motor neurone disease seen by a motor neuron disease clinic in Nottingham (UK) between 1990 and 2000.                                                                   | Referral | 25 motor neurone patients were referred to hospice care. Within this population, more females died in hospice compared to males.                                                                                                                                          | MMM = <b>M</b> |
| 86. O'Brien 1992        | Motor Neurone Disease: a Hospice Perspective.                                                                                                            | British Medical Journal. 1992; 204(6825): 471-3.                      | 124 patients with motor neurone disease cared for by St Christopher's Hospice (UK) between January 1980 and November 1990.                                                                 | Referral | In a 10 year period, only 124 patients with motor neurone disease were cared for at the hospice.                                                                                                                                                                          | MMM = <b>M</b> |
| 87. Sleeman 2013        | Place of death, and its relation with underlying cause of death, in Parkinson's disease, motor neurone and multiple sclerosis: A population-based study. | Palliative Medicine. 2013; 27(9): 840-846.                            | All deaths (n=125,242) in England (UK) with a contribution from Parkinson's Disease (PD), Multiple Sclerosis (MS) or Motor Neurone Disease (MND) between 1993-2010.                        | Referral | Hospice deaths were extremely uncommon in PD and MS (0.6% and 2.5%) but more common in MND (11.2%).                                                                                                                                                                       | HHM = <b>H</b> |
| 88. Martin 2016         | Progressive Dwindling in Multiple Sclerosis: An Opportunity to Improve Care.                                                                             | PLoS One. 2016; 11(7): e0159210.                                      | 582 patients with multiple sclerosis (MS) who died between 1998 and 2015 and had been registered with the UK MS Tissue Bank.                                                               | Death    | 4.6% of patients died in a hospice. Those who died an MS-related death were far less likely to die in a hospice than those who died a non-MS related death.                                                                                                               | HHM = <b>H</b> |
| 89. Chochinov 2012      | Comparative health care use patterns of people with schizophrenia near the end of life: a population-based study in Manitoba, Canada.                    | Schizophrenia Research. 2012; 141: 241-246.                           | A matched cohort study of 3943 decedents with schizophrenia and 11827 decedents without schizophrenia who died between 1995 and 2008 in Manitoba (Canada).                                 |          | Decedents without schizophrenia were less likely to be using SPC services than those without schizophrenia.                                                                                                                                                               | MLM = <b>M</b> |
| 90. Butler 2018         | Access to specialist palliative care services by people with severe and persistent mental illness: A retrospective cohort study.                         | International Journal of Mental Health Nursing. 2018; 27(2): 737-746. | 147 individuals with serious and persistent mental illness were compared with the general population (n = 3956) in the Capital and Coast District Health Board (New Zealand) in 2008-2014. | Referral | People with serious and persistent mental illness were 3.51 times less likely to access SPC services than the general population.                                                                                                                                         | HHH = <b>H</b> |
| 91. Addington-Hall 1998 | Which terminally ill cancer patients receive hospice in-patient care?                                                                                    | Social Science and Medicine. 1998; 46(8): 1011-1016.                  | 2074 cancer decedents in the last quarter of 1990 in 20 self-selected English districts.                                                                                                   | Death    | Factors associated with increased likelihood of hospice inpatient care included being aged under 75 and having specific symptoms (pain in the last year of life or constipation).                                                                                         | HHH = <b>H</b> |
| 92. Burge 2002          | Population-based trends in referral of the elderly to a comprehensive palliative care program.                                                           | Palliative Medicine. 2002; 16: 255-256.                               | 4376 cancer decedents in the Halifax Regional Municipality (Canada) between 1992 and 1997.                                                                                                 | Referral | Patients aged over 65 were much less likely to be referred to SPC services compared to those under 65.                                                                                                                                                                    | HMM = <b>M</b> |
| 93. Burge 2008          | A Population-based Study of Age Inequalities in Access to Palliative Care Among Cancer Patients.                                                         | Medical Care. 2008; 46(12): 1203-1211.                                | 7511 cancer decedents in Nova Scotia (Canada) between January 1998 and December 2003.                                                                                                      | Referral | Registration with a palliative care program was more likely amongst those with cancer, those <65 years old, women, and those living in upper income neighbourhoods. Patients in Francophone communities were less likely to be registered with a palliative care program. | HHH = <b>H</b> |
| 94. Burt 2010a          | Deprivation Scores and Access to Specialist Palliative Care Services in Cancer Patients in Dundee.                                                       | Palliative Medicine. 2010; 24: S172.                                  | Audit of 108 patients in Dundee (UK) dying from cancer over the last three months of 2006.                                                                                                 | Referral | Social deprivation did not affect access to SPC services. Younger patients were more likely to access services.                                                                                                                                                           | LLL = <b>L</b> |
| 95. Cartwright 1993     | Dying when you're old.                                                                                                                                   | Age and Ageing. 1993; 22(6): 425-430.                                 | Interview of 639 decedents in 10 areas of England in 1987.                                                                                                                                 | Death    | Increasing age was associated with a decreased likelihood of hospice death.                                                                                                                                                                                               | HMM = <b>M</b> |
| 96. Davies 2006         | How is place of death from cancer changing and what affects it? Analysis of cancer registration and service data.                                        | British Journal of Cancer. 2006; 95(5): 593-600.                      | 216,404 cancer decedents in South-East England between 1985 and 2002.                                                                                                                      | Referral | Hospice death was more likely for specific cancer diagnoses, and those aged <75.                                                                                                                                                                                          | HHH = <b>H</b> |
| 97. Evans 2014          | Place and Cause of Death in Centenarians: A Population-Based Observational Study in England, 2001 to 2010.                                               | PLoS Medicine. 2014; 11(6): e1001653.                                 | 35,867 decedents aged ≥100 years in England who died between 2001 and 2010.                                                                                                                | Referral | 0.2% of centenarians died in a hospice.                                                                                                                                                                                                                                   | HMM = <b>M</b> |
| 98. Fleming 2010        | Place of death for the 'oldest old': ≥85-year-olds in the CC75C population-based cohort.                                                                 | British Journal of General Practice. 2010; 60(573): e171-e179.        | 320 decedents aged ≥85 years in Cambridgeshire (UK) 1985-2007.                                                                                                                             | Death    | 2% of this cohort died in a hospice.                                                                                                                                                                                                                                      | HHM = <b>H</b> |

|                     |                                                                                                                                      |                                                                         |                                                                                                                                                                                                                                                |          |                                                                                                                                                                                                                              |                |
|---------------------|--------------------------------------------------------------------------------------------------------------------------------------|-------------------------------------------------------------------------|------------------------------------------------------------------------------------------------------------------------------------------------------------------------------------------------------------------------------------------------|----------|------------------------------------------------------------------------------------------------------------------------------------------------------------------------------------------------------------------------------|----------------|
| 99. Gray 1997       | Factors associated with utilisation of specialist palliative care services: a population based study.                                | Journal of Public Health Medicine. 1997; 19(4): 464-469.                | 521 patients who had died in a Northern England Health District in 1991.                                                                                                                                                                       | Referral | There was no variation in specialist palliative care provision according to gender, location, socioeconomic status or cancer site. Those who received specialist palliative care were younger compared to those who did not. | HMH = <b>H</b> |
| 100. Kessler 2005   | Social class and access to specialist palliative care services.                                                                      | Palliative Medicine. 2005; 19: 105-110.                                 | Survey and interview of 960 cancer decedents and 18 carers of these patients in Bristol (UK) between September 1999 and November 2002.                                                                                                         | Death    | Those from a lower social class were less likely to die in a hospice.                                                                                                                                                        | HHH = <b>H</b> |
| 101. Lock 2005      | Patterns and predictors of place of cancer death for the oldest old.                                                                 | BMC Palliative Care. 2005; 4: 6.                                        | All cancer deaths (n =314,462) in England and Wales in those aged 75 and upwards between 1995 and 1999.                                                                                                                                        | Death    | The proportion of people who died in a hospice increased between 1995 and 1999. There were marked differences between the 'younger old' and the 'oldest old', with the 'oldest old' less likely to die in a hospice.         | HMH = <b>H</b> |
| 102. McNamara 2007b | Specialist palliative care use for people dying of cancer in Western Australia.                                                      | Cancer Forum. 2007; 21(1): 18-22.                                       | 8007 decedents in Western Australia between July 2000 and December 2002.                                                                                                                                                                       | Death    | Patients who were single or widowed; those aged over 85 years old; and those living in a region other than a major city were significantly less likely to receive specialist palliative care services.                       | HHH = <b>H</b> |
| 103. O'Dowd 2016    | Place of Death in Patients with Lung Cancer: A Retrospective Cohort Study from 2004-2013.                                            | PLoS One. 2016; 11(8): e0161399.                                        | 143,627 patients registered with the National (UK) Lung Cancer Audit between January 2004 and December 2011.                                                                                                                                   | Referral | There was a small increase in patients dying within hospice beds. Factors associated with hospice death included younger age and higher Townsend quintile. There were regional inequalities in hospice provision.            | HMH = <b>H</b> |
| 104. Ziegler 2018   | Age Variation in the Care from Diagnosis to Death for Cancer Patients: A Retrospective Longitudinal Study in a UK Cancer Population. | Palliative Medicine. 2018; 32 S1: 3-330.                                | Retrospective cohort study linking cancer registry and secondary care data for 13,499 adult cancer patients who died between January 2005 and December 2011.                                                                                   | Referral | Compared with adult patients under 60 years, patients aged 80 years and over were less likely to die in a hospice, but more likely to die in a care home.                                                                    | MMM = <b>M</b> |
| 105. Verne 2018a    | What Does National Mortality Data Tell Us about Where Head and Neck Cancer Patients Die and What Influences This?                    | Palliative Medicine. 2018; 32 S1: 3-330.                                | Office for National Statistics (ONS) Mortality Dataset.                                                                                                                                                                                        | Referral | Younger patients more likely to die at home (28%) or in hospice (<65 years 25%), and older in care homes.                                                                                                                    | MHL = <b>M</b> |
| 106. Kamisetty 2015 | Where do patients treated for oral cancer die? A 20-year old cohort study 1992-2011.                                                 | British Journal of Oral and Maxillofacial Surgery. 2015; 53: 1015-1020. | 1290 patients treated for primary squamous cell carcinomas at the Maxillofacial Unit in Liverpool (UK) between 1992 and 2011.                                                                                                                  | Referral | Patients treated for oral cancer were more likely to die at a hospice in 2011 than in the past. Those who were 85+ and those without cancer as underlying cause of death died in hospice less.                               | HMM = <b>M</b> |
| 107. Burt 2010b     | Equity of use of specialist palliative care by age: cross-sectional study of lung cancer patients.                                   | Palliative Medicine. 2010; 24(6): 641-650.                              | Questionnaire involving 252 patients with either non-small cell lung cancer or small cell lung cancer, and 137 carers attending chest or oncology outpatient clinics at four NHS trusts in south London (UK) between June 2006 and April 2007. | Referral | 39% of participants had confirmed use of SPC. Age, gender, deprivation, living alone, current or most recent line of treatment, number of co-morbidities and carer stress were not associated with receipt of such services. | MMM = <b>M</b> |
| 108. Kamisetty 2011 | Place of death of oral and oropharyngeal squamous cell carcinoma (OOSCC) patients 1992–2009: who dies at home?                       | British Journal of Oral and Maxillofacial Surgery. 2011; 49 S1: 9.      | 1392 newly diagnosed patients with OOSCC presenting to the Maxillofacial Unit in Liverpool (UK) between 1992 and 2009.                                                                                                                         | Referral | 78 out of 541 deaths took place in a hospice.                                                                                                                                                                                | MLM = <b>M</b> |
| 109. Bradshaw 1993  | Characteristics of clients referred to home, hospice and hospital palliative care services in Western Australia.                     | Palliative Medicine. 1993; 7: 101-107.                                  | 60 records of patients who had died in a six-month period in three SPC settings – hospice care service, cottage hospice and a palliative care unit within a general hospital in Perth (Australia).                                             | Death    | Older age, female gender and not having a primary caregiver were associated with a reduced likelihood of receiving care from hospice services.                                                                               | MMM = <b>M</b> |



|                    |                                                                                                                                                                                              |                                                        |                                                                                                                                                                                         |          |                                                                                                                                                                                                                                                   |                |
|--------------------|----------------------------------------------------------------------------------------------------------------------------------------------------------------------------------------------|--------------------------------------------------------|-----------------------------------------------------------------------------------------------------------------------------------------------------------------------------------------|----------|---------------------------------------------------------------------------------------------------------------------------------------------------------------------------------------------------------------------------------------------------|----------------|
| 110. Madden 2011   | Using maps and funnel plots to explore variation in place of death from cancer within London, 2002–2007.                                                                                     | Palliative Medicine. 2011; 25(4): 323-332              | Cancer deaths in London (UK) between 2002 and 2007 (n=84066).                                                                                                                           | Death    | Primary care trusts with a hospice in their area tended to have higher proportions of hospice deaths.                                                                                                                                             | HMM = <b>H</b> |
| 111. Davison 2001  | Where do patients with cancer die in Belfast?                                                                                                                                                | Irish Journal of Medical Science. 2001; 170(1): 18-23. | Deaths attributable to cancer in Belfast (UK) in 1977 (n = 443), 1987 (n = 455) and 1997 (n = 426).                                                                                     | Referral | There was an association between place of death and age, marital status, type of cancer and area of residence, but not with social class or gender. Changes over time were reported.                                                              | HMM = <b>M</b> |
| 112. Dunphy 1990   | A comparison of hospice and home care patients: patterns of referral, patient characteristics and predictors of place of death.                                                              | Palliative Medicine. 1990; 4: 105-111.                 | 404 hospice and 143 home care patients from St Joseph's Hospice London (UK) who had died during the first six months in 1988.                                                           | Death    | Access to hospice was even across genders.                                                                                                                                                                                                        | HMM = <b>H</b> |
| 113. Coupland 2011 | Does place of death from cancer vary between ethnic groups in South East England?                                                                                                            | Palliative Medicine. 2011; 25(4): 314-322.             | 101,516 cancer decedents in South East England between 1998 and 2006.                                                                                                                   | Death    | Death in a hospice was significantly less common for Pakistani, Bangladeshi and Indian patients than for Caucasian patients. Chinese, Black African and Black Caribbean patients had a similar likelihood of hospice death as Caucasian patients. | MHH = <b>H</b> |
| 114. Gaffin 1996   | Opening doors: improving access to hospice and specialist palliative care services by members of the black and minority ethnic communities.                                                  | British Journal of Cancer. 1996; 29: S51-S53.          | Study of hospice services in two London boroughs (Brent and Newham) and in North Birmingham (UK).                                                                                       | Referral | Hospices tend to be located in white, middle class areas. People from minority communities were less likely to ask their GP for access to hospice services.                                                                                       | LLM = <b>L</b> |
| 115. Karim 2000    | Non-white ethnicity and the provision of specialist palliative care services: factors affecting doctor's referral patterns.                                                                  | Palliative Medicine. 2000; 14: 471-478.                | Interview of 27 GPs from two wards in Birmingham (UK).                                                                                                                                  | Death    | Language and staff bias were barriers to the referral of black/ethnic minorities to specialist palliative care services.                                                                                                                          | MMH = <b>M</b> |
| 116. Koffman 2004  | Dying to be Home? Preferred Location of Death of First-Generation Black Caribbean and Native-Born White Patients in the United Kingdom.                                                      | Journal of Palliative Medicine. 2004; 7(5): 628-636.   | 106 black Caribbean patients and 110 white patients from the UK were contacted to produce a sample of 50 cases per ethnic group. These informants were surveyed over a 13 month period. | Referral | 8% of Caribbean patients died in a hospice, compared to 16% of native-born white patients. This reflected patient preference.                                                                                                                     | HMM = <b>M</b> |
| 117. Koffman 2014  | Does Ethnicity Affect Where People with Cancer Die? A Population-Based 10 Year Study.                                                                                                        | PLoS One. 2014; 9(4): e95052.                          | 93,375 cancer decedents aged ≥65 years in London (UK) 2001-2010.                                                                                                                        | Death    | Deaths in a hospice setting were significantly less likely among those born in Asia and Africa.                                                                                                                                                   | HHH = <b>H</b> |
| 118. Worth 2009    | Vulnerability and access to care for South Asian Sikh and Muslim patients with life limiting illness in Scotland: prospective longitudinal qualitative study.                                | British Medical Journal. 2009; 338: b183.              | 92 interviews of patients, family carers and health professionals in Central Scotland (UK).                                                                                             | Referral | Only two patients accessed specialist palliative care services. Interviews revealed perceived advantages of, and barriers to the receipt of hospice care amongst ethnic minority patients.                                                        | MMH = <b>M</b> |
| 119. Fountain 1999 | Ethnic minorities and palliative care in Derby.                                                                                                                                              | Palliative Medicine. 1999; 13: 161-162.                | 1035 new referrals to Derby (UK) SPC services.                                                                                                                                          | Death    | Ethnic minorities were slightly more likely than white patients to receive certain SPC services.                                                                                                                                                  | MMM = <b>M</b> |
| 120. Sharpe 2015   | Policy for home or hospice as the preferred place of death from cancer: Scottish Health and Ethnicity Linkage Study population cohort shows challenges across all ethnic groups in Scotland. | BMJ Supportive and Palliative Care. 2015; 5: 443-451.  | All cancer patients (n=117,467) aged 25 years or older who participated in the 2001 Scottish census and died from cancer in Scotland between May 2001 and December 2009.                | Referral | The Chinese cohort had the largest proportion of hospice cancer deaths (29.9%).                                                                                                                                                                   | HMM = <b>H</b> |
| 121. Verne 2018b   | Choice and Place of Death - Does Ethnicity Affect where People Die? - Insights from Routine Data Analysis.                                                                                   | Palliative Medicine. 2018; 32 S1: 3-330.               | National data set for England used, which linked Office for National Statistics mortality data to National Hospital Episode data.                                                       | Death    | Among people who died from cancer: 18,11,20 and 22% people of White British, Pakistani, African, and Chinese origin died in a hospice respectively.                                                                                               | MHM = <b>M</b> |
| 122. Waran 2017    | The gap reversed: a review of site of death in the Top End.                                                                                                                                  | The Medical Journal of Australia. 2017; 3(207) S1: 39. | 308 people, most were men, and most were indigenous Australians.                                                                                                                        | Death    | Indigenous people died in hospices much less frequently compared to non-indigenous people.                                                                                                                                                        | LML = <b>L</b> |
| 123. Currow 2012   | Referral patterns and proximity to palliative care inpatient services by level                                                                                                               | BMC Health Services Research. 2012; 12: 424.           | Service mapping of 10,064 patients documented in the Palliative Care                                                                                                                    | Death    | People from the most disadvantaged socio-economic group were less likely to be referred to SPC services.                                                                                                                                          | HMM = <b>H</b> |

|                      |                                                                                                                                                                                            |                                                                   |                                                                                                                                                                                                        |          |                                                                                                                                                                                                                                                                                                                                                                                                                     |                |
|----------------------|--------------------------------------------------------------------------------------------------------------------------------------------------------------------------------------------|-------------------------------------------------------------------|--------------------------------------------------------------------------------------------------------------------------------------------------------------------------------------------------------|----------|---------------------------------------------------------------------------------------------------------------------------------------------------------------------------------------------------------------------------------------------------------------------------------------------------------------------------------------------------------------------------------------------------------------------|----------------|
|                      | of socio-economic disadvantage. A national study using spatial analysis.                                                                                                                   |                                                                   | Outcomes Collaboration (PCOC) in Australia in 2006.                                                                                                                                                    |          |                                                                                                                                                                                                                                                                                                                                                                                                                     |                |
| 124. Shulman 2018    | End-of-life care for homeless people: a qualitative analysis exploring the challenges to access and provision of palliative care.                                                          | Palliative Medicine. 2018; 32(1): 36-45.                          | 127 participants, made up of: single homeless people (n=28), formerly homeless people (n=10), health- and social-care providers (n=48), hostel staff (n=30) and outreach staff (n=10).                 | Death    | Accessing hospice services is challenging for homeless people because of stigma, complex multi-morbidities and trauma, substance misuse/dependence, mental health problems, unstable housing conditions, previous experiences that hospices had with supporting homeless people and many more. Even for homeless cancer patients who were not misusing substances, placement within a hospice remained challenging. | HLL = <b>M</b> |
| 125. Burns 2015      | Who provides care for people dying of cancer? A comparison of a rural and metropolitan cohort in a South Australian bereaved population study.                                             | Australian Journal of Rural Health. 2015; 23(1): 24-31.           | 23,588 survey responses on the death of 'someone close'.                                                                                                                                               | Death    | In rural areas, half as many people died in hospice compared to those in urban areas. Rates of home death were identical but more rural patients died in hospital compared to urban patients.                                                                                                                                                                                                                       | MMM = <b>M</b> |
| 126. Rainsford 2018  | Place of death in the Snowy Monaro region of New South Wales: A study of residents who died of a condition amenable to palliative care.                                                    | Australian Journal of Rural Health. 2018; 26(2): 126-33.          | Residents, with advanced frailty or one of 10 conditions amenable to palliative care, who died between 1 February 2015 and 31 May 2016. The records of 224 residents who had died in the study period. | Death    | In Rural regions: Much less likely to die in hospice compared to residence, hospital, or RACF.                                                                                                                                                                                                                                                                                                                      | MML = <b>M</b> |
| 127. Gatrell 2012    | Variation in geographic access to specialist inpatient hospices in England and Wales.                                                                                                      | Health and Place. 2012; 18(4): 832-840.                           | Death records at 189 specialist adult inpatient hospices in England and Wales, 2003-5.                                                                                                                 | Death    | There were geographical discrepancies in access to inpatient hospices. Urban areas were well served by hospices but large parts of England and Wales had poor access to hospices. There were many examples of mismatches between supply and demand.                                                                                                                                                                 | HHH = <b>H</b> |
| 128. Wood 2004       | Equity of access to adult hospice inpatient care within north-west England.                                                                                                                | Palliative Medicine. 2004; 18: 543-549.                           | Cancer deaths in the North-West of England (UK) in 2000 (n = not known).                                                                                                                               | Death    | There were 3500 adults likely to have cancer who could have benefited from inpatient hospice care, but who were living in areas that were relatively inaccessible to one or more hospices.                                                                                                                                                                                                                          | LLL = <b>L</b> |
| 129. Chukwusa 2019   | Urban and rural differences in geographical accessibility to inpatient palliative and end-of-life (PEoLC) facilities and place of death: a national population-based study in England, UK. | International Journal of Health Geographics. 2019; 18(1): 8.      | 430,467 individual- level death data extracted from Office for National Statistics data.                                                                                                               | Referral | Those who lived more than 10 minutes away from inpatient PEoLC facilities were less likely to die there. The larger the drive time, the less likely to die in hospice. The effect of drive time was greater in rural areas.                                                                                                                                                                                         | MMM = <b>M</b> |
| 130. O'Dowd 2015     | Place and Cause of Death in Patients with Lung Cancer in the United Kingdom.                                                                                                               | Journal of Thoracic Oncology. 2015; 2: S518                       | 143,627 patients registered with the National (UK) Lung Cancer Audit between January 2004 and December 2011.                                                                                           | Referral | 17% of lung cancer patients died in a hospice.                                                                                                                                                                                                                                                                                                                                                                      | LLL = <b>L</b> |
| 131. Seamark 1995    | Appropriate place of death for cancer patients: views of general practitioners and hospital doctors.                                                                                       | British Journal of General Practice. 1995; 45(396): 359-63.       | Questionnaires sent to health practitioners in Exeter Health District (UK) regarding cancer deaths (n = 1053) between May 1991 to April 1992.                                                          | Death    | Hospice involvement occurred in 39% of the total cancer deaths. The lack of availability of a city-based hospice affected the management of around a third of patients cared for by GPs and hospital doctors.                                                                                                                                                                                                       | MMH = <b>M</b> |
| 132. Campbell 2010   | Exploring differences in referrals to a hospice at home service in two socio-economically distinct areas of Manchester, UK.                                                                | Palliative Medicine. 2010; 24(4): 403-409.                        | UK National Census 2001 Data from 41 census wards in Salford and Trafford (UK), and referral data from St Ann's Hospice (UK) 2004-2006.                                                                | Referral | Patients from socially deprived areas have higher SPC needs but lower referral rates.                                                                                                                                                                                                                                                                                                                               | HHH = <b>H</b> |
| 133. Cartwright 1992 | Social class differences in health and care in the year before death.                                                                                                                      | Journal of Epidemiology and Community Health. 1992; 46(1): 54-57. | Interview of 639 decedents in 10 areas of England in 1987.                                                                                                                                             | Death    | Middle class decedents were more likely to die in a hospice compared to working class decedents.                                                                                                                                                                                                                                                                                                                    | HMM = <b>M</b> |
| 134. Cunningham 2011 | Income inequities in end-of-life health care spending in British Columbia, Canada: A cross-sectional analysis, 2004-2006.                                                                  | International Journal for Equity in Health. 2011; 10(1): 12.      | 58,820 decedents aged 65 and older in British Columbia (Canada) between 2004 and 2006.                                                                                                                 | Referral | Lower income was associated with a decreased likelihood of using SPC services.                                                                                                                                                                                                                                                                                                                                      | HMM = <b>M</b> |

|                      |                                                                                                    |                                                       |                                                                                                                                                       |          |                                                                                                                                                                                                                                            |                |
|----------------------|----------------------------------------------------------------------------------------------------|-------------------------------------------------------|-------------------------------------------------------------------------------------------------------------------------------------------------------|----------|--------------------------------------------------------------------------------------------------------------------------------------------------------------------------------------------------------------------------------------------|----------------|
| 135. Sims 1997       | Social class variation in place of cancer death.                                                   | Palliative Medicine. 1997; 11: 369-373.               | 831 cancer decedents in Doncaster (UK) in 1996.                                                                                                       | Referral | Patients from higher social classes were more likely to die in a hospice.                                                                                                                                                                  | HMH = <b>H</b> |
| 136. Macfarlane 2016 | Does place of death vary by deprivation for patients known to specialist palliative care services? | BMJ Supportive & Palliative Care. 2018; 8(4): 428-30. | Place of death and postcode for 485 consecutive patients known to Specialist palliative care services within NHS Lothian (UK), who died in 2014-2015. | Referral | Higher rates of in-hospice death for the least deprived, compared to the most deprived. Greater deprivation is associated with decreased likelihood of dying in hospice. Even after referral to SPC services, these discrepancies persist. | MMM = <b>M</b> |
| 137. Bowers 2018     | Socioeconomic status is associated with place of death in patients known to hospice services.      | Scottish Medical Journal. 2018; 63(1): 53-53.         | 4585 patient deaths.                                                                                                                                  | Death    | As affluence increases percentage likelihood of dying in hospice increases. Deaths in hospice were most frequent in the least deprived quintile and least frequent in the three most deprived quintiles.                                   | MMM = <b>M</b> |
| 138. Ziway 2017      | Impact of place of residence on place of death in Wales: an observational study.                   | BMC Palliative Care. 2017; 16: 72.                    | Welsh (UK) population mortality statistics from 2005 to 2014.                                                                                         | Death    | Hospice mortality rates appeared to be independent of deprivation quintile.                                                                                                                                                                | MLL = <b>L</b> |
